# Supplementary material for: Immunohistochemistry for identification of CCND1, NSD2, and MAF gene rearrangements in plasma cell myeloma
Source: PubMed Central journal article supplement — Cancer Sci. 2019 Jul 11;110(8):2600–6. doi: 10.1111/cas.14109 (PMC6676137; doi:10.1111/cas.14109), 2019-07-11

## Supplementary Table S1.

Distribution of the rearrangement-positive myeloma cases according to immunohistochemical positivity

|          | Cohort 1        |        |        | Cohort 2        |        |       | Total           |        |        |
|----------|-----------------|--------|--------|-----------------|--------|-------|-----------------|--------|--------|
|          | Rearranged gene |        |        | Rearranged gene |        |       | Rearranged gene |        |        |
| IHC      | CCND1           | NSD2   | MAF    | CCND1           | NSD2   | MAF   | CCND1           | NSD2   | MAF    |
| Class*   | (n=20)          | (n=20) | (n=10) | (n=26)          | (n=13) | (n=4) | (n=46)          | (n=33) | (n=14) |
| 0% - 5%  | 0               | 1      | 1      | 0               | 0      | 0     | 0               | 1      | 1      |
| 5 - 10   | 1               | 0      | 0      | 1               | 1      | 0     | 2               | 1      | 0      |
| 10 - 15  | 2               | 1      | 1      | 0               | 0      | 0     | 2               | 1      | 1      |
| 15 - 20  | 0               | 0      | 0      | 0               | 0      | 0     | 0               | 0      | 0      |
| 20 - 25  | 1               | 0      | 0      | 4               | 0      | 0     | 5               | 0      | 0      |
| 25 - 30  | 0               | 0      | 0      | 0               | 0      | 0     | 0               | 0      | 0      |
| 30 - 35  | 2               | 1      | 0      | 1               | 0      | 1     | 3               | 1      | 1      |
| 35 - 40  | 0               | 0      | 0      | 0               | 0      | 0     | 0               | 0      | 0      |
| 40 - 45  | 2               | 0      | 0      | 2               | 0      | 0     | 4               | 0      | 0      |
| 45 - 50  | 0               | 0      | 0      | 0               | 0      | 0     | 0               | 0      | 0      |
| 50 - 55  | 0               | 0      | 0      | 1               | 1      | 0     | 1               | 1      | 0      |
| 55 - 60  | 0               | 0      | 0      | 0               | 0      | 0     | 0               | 0      | 0      |
| 60 - 65  | 3               | 1      | 1      | 1               | 0      | 0     | 4               | 1      | 1      |
| 65 - 70  | 0               | 0      | 0      | 0               | 0      | 0     | 0               | 0      | 0      |
| 70 - 75  | 0               | 1      | 1      | 3               | 0      | 0     | 3               | 1      | 1      |
| 75 - 80  | 0               | 0      | 0      | 0               | 0      | 0     | 0               | 0      | 0      |
| 80 - 85  | 2               | 5      | 1      | 4               | 1      | 0     | 6               | 6      | 1      |
| 85 - 90  | 0               | 0      | 0      | 0               | 0      | 0     | 0               | 0      | 0      |
| 90 - 95  | 5               | 1      | 0      | 4               | 2      | 2     | 9               | 3      | 2      |
| 95 - 100 | 2               | 9      | 5      | 5               | 8      | 1     | 7               | 17     | 6      |

IHC, immunohistochemistry; \*, immunohistochemically positive tumor cells

Supplementary Table S2. Cohort 1 and Cohort 2 myeloma cases (n=190)

| Molecule | Sensitivity (95% CI) | Specificity (95% CI) | Accuracy (95% CI) |
|----------|----------------------|----------------------|-------------------|
| CCND1    | 1.00 (0.92-1.00)     | 0.99 (0.95-1.00)     | 0.99 (0.96-1.00)  |
| NSD2     | 0.94 (0.80-0.99)     | 0.98 (0.95-1.00)     | 0.97 (0.94-0.99)  |
| MAF      | 0.93 (0.66-1.00)     | 0.99 (0.97-1.00)     | 0.99 (0.96-1.00)  |

Supplementary Fig. S1.

Sequential retrieval of whole-slide imaging (WSI) data of H&E staining, immunofluorescence (IF) for CD138, and fluorescence in situ hybridization (FISH) for the *CCND1* gene split

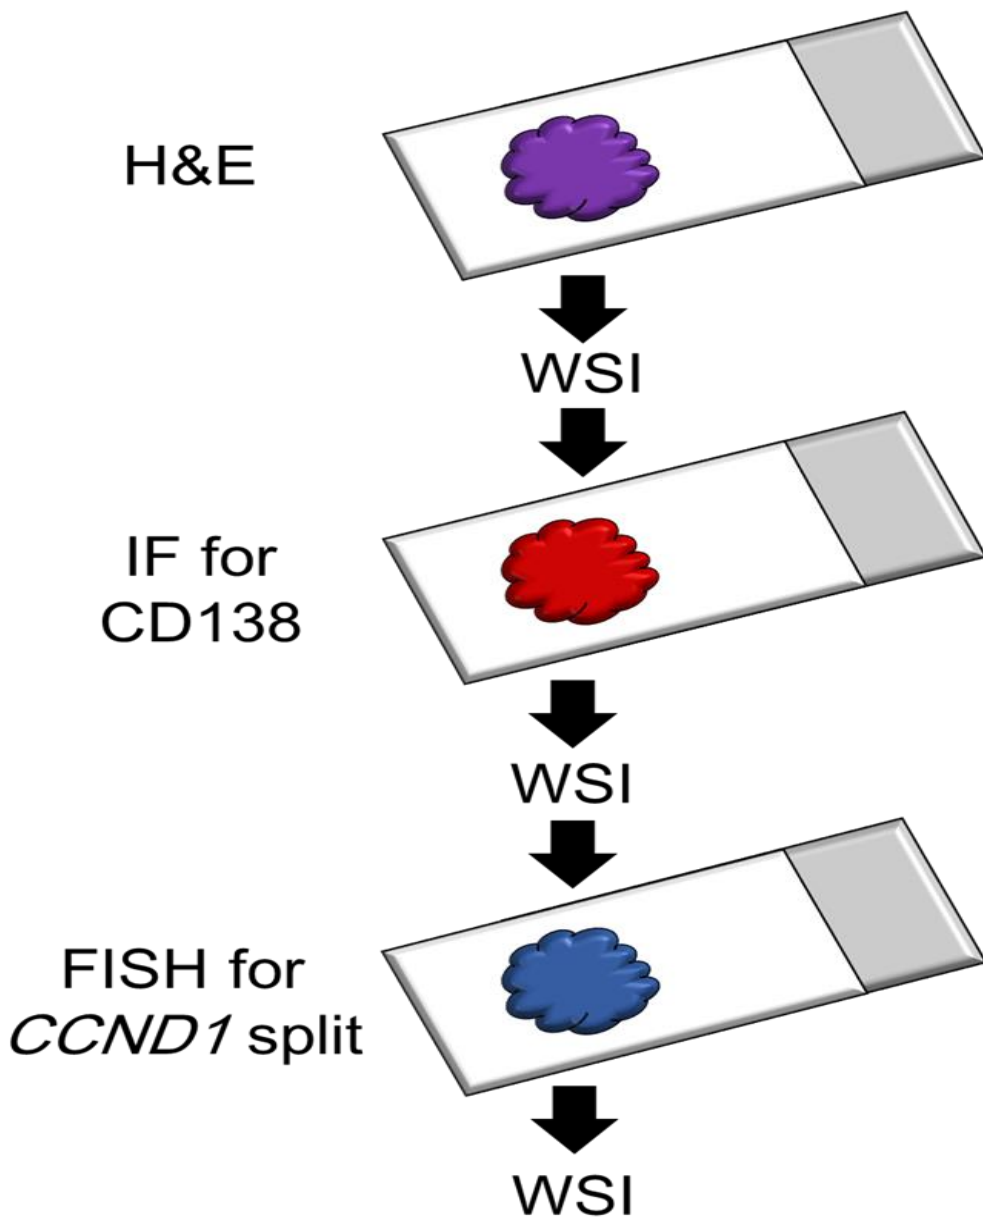

Supplementary Fig. S2.

Cohort 1 flowchart illustrating the number of myeloma cases and study data. FISH, fluorescence *in situ* hybridization; IHC, immunohistochemistry; and ROC, receiver operating characteristics

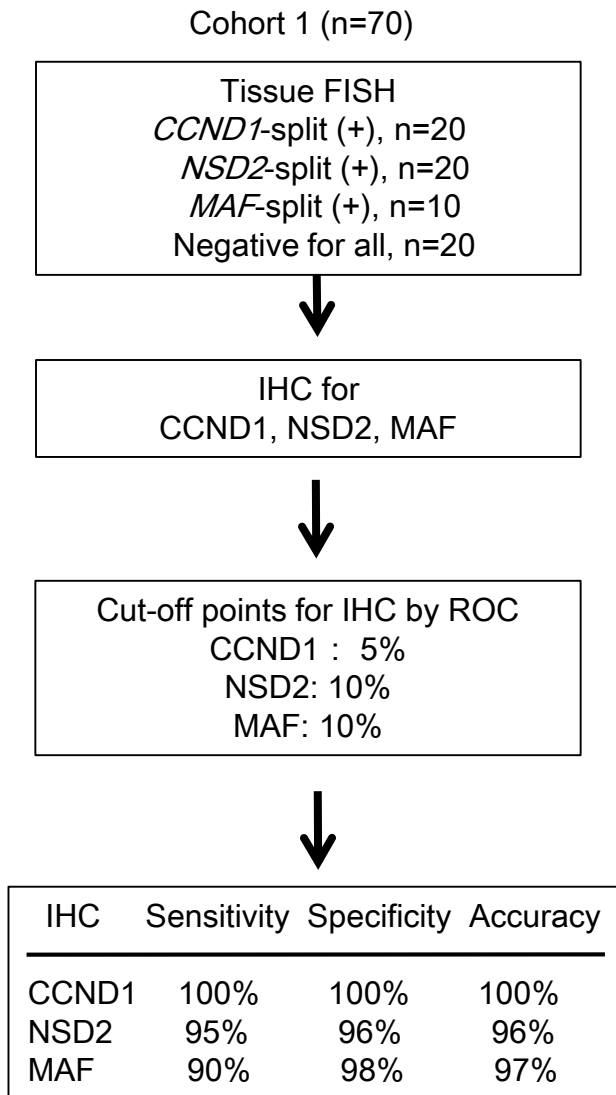

Supplementary Fig. S3.

Cohort 2 flowchart illustrating the number of myeloma cases and study data. IHC, immunohistochemistry and FISH, fluorescence *in situ* hybridization

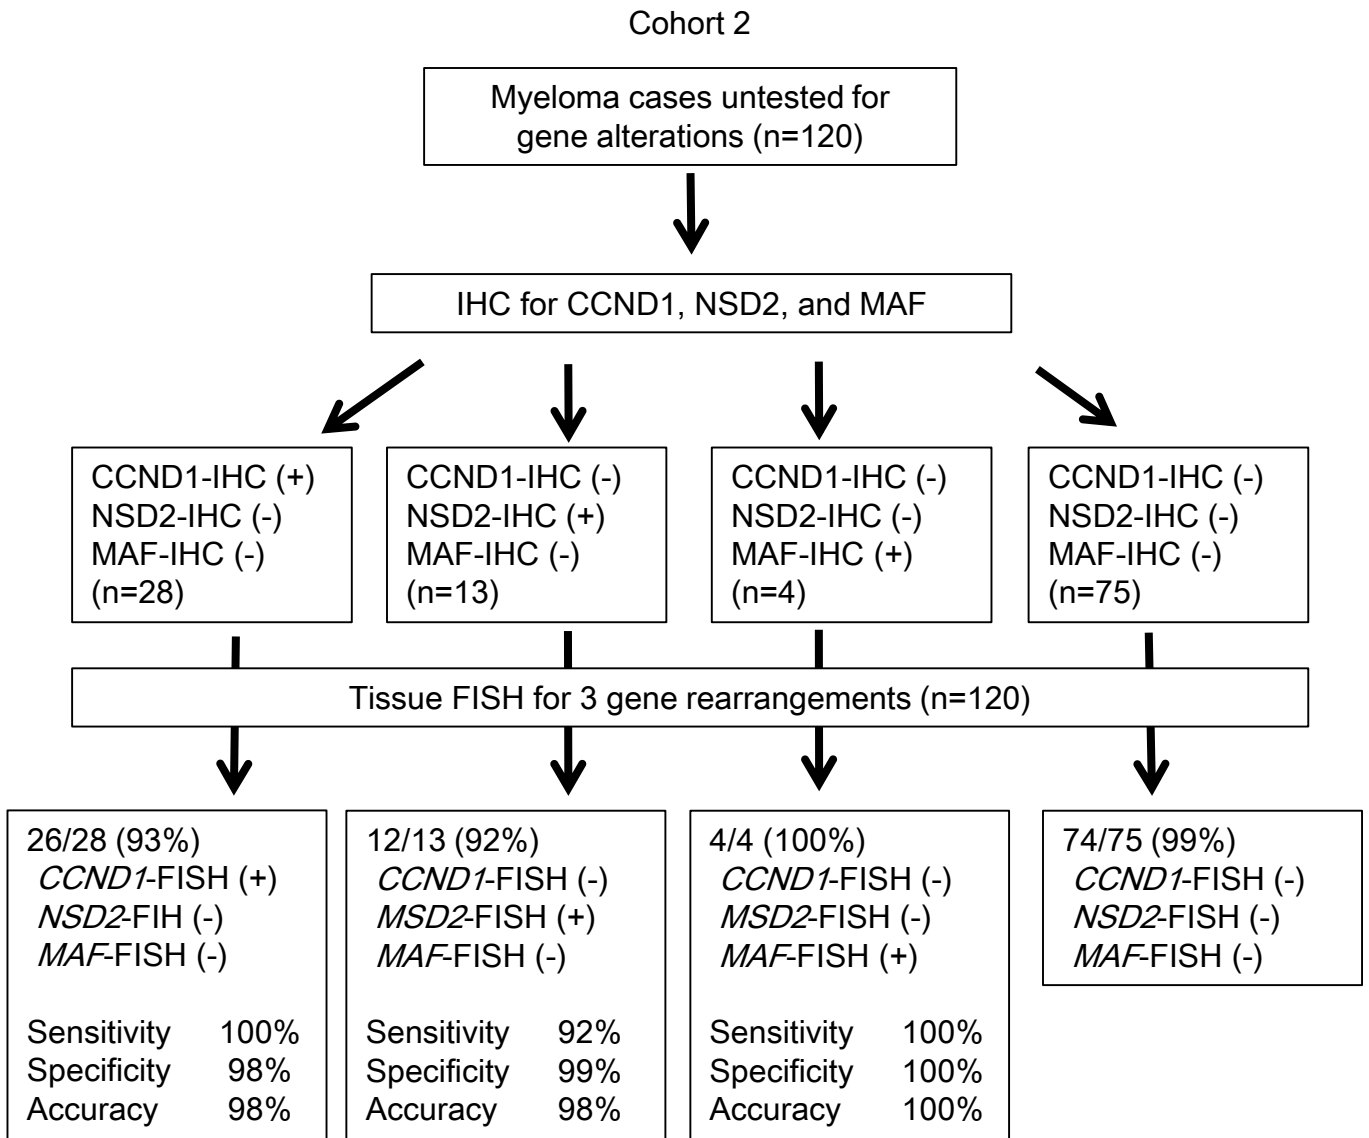

Supplementary Fig. S4.

Evaluation of FISH signals in formalin-fixed paraffin-embedded tissue sections. When using a dual-color FISH probe, the number of FISH signals to be evaluated is greater than when using a break-apart FISH probe. FISH, fluorescence *in situ* hybridization

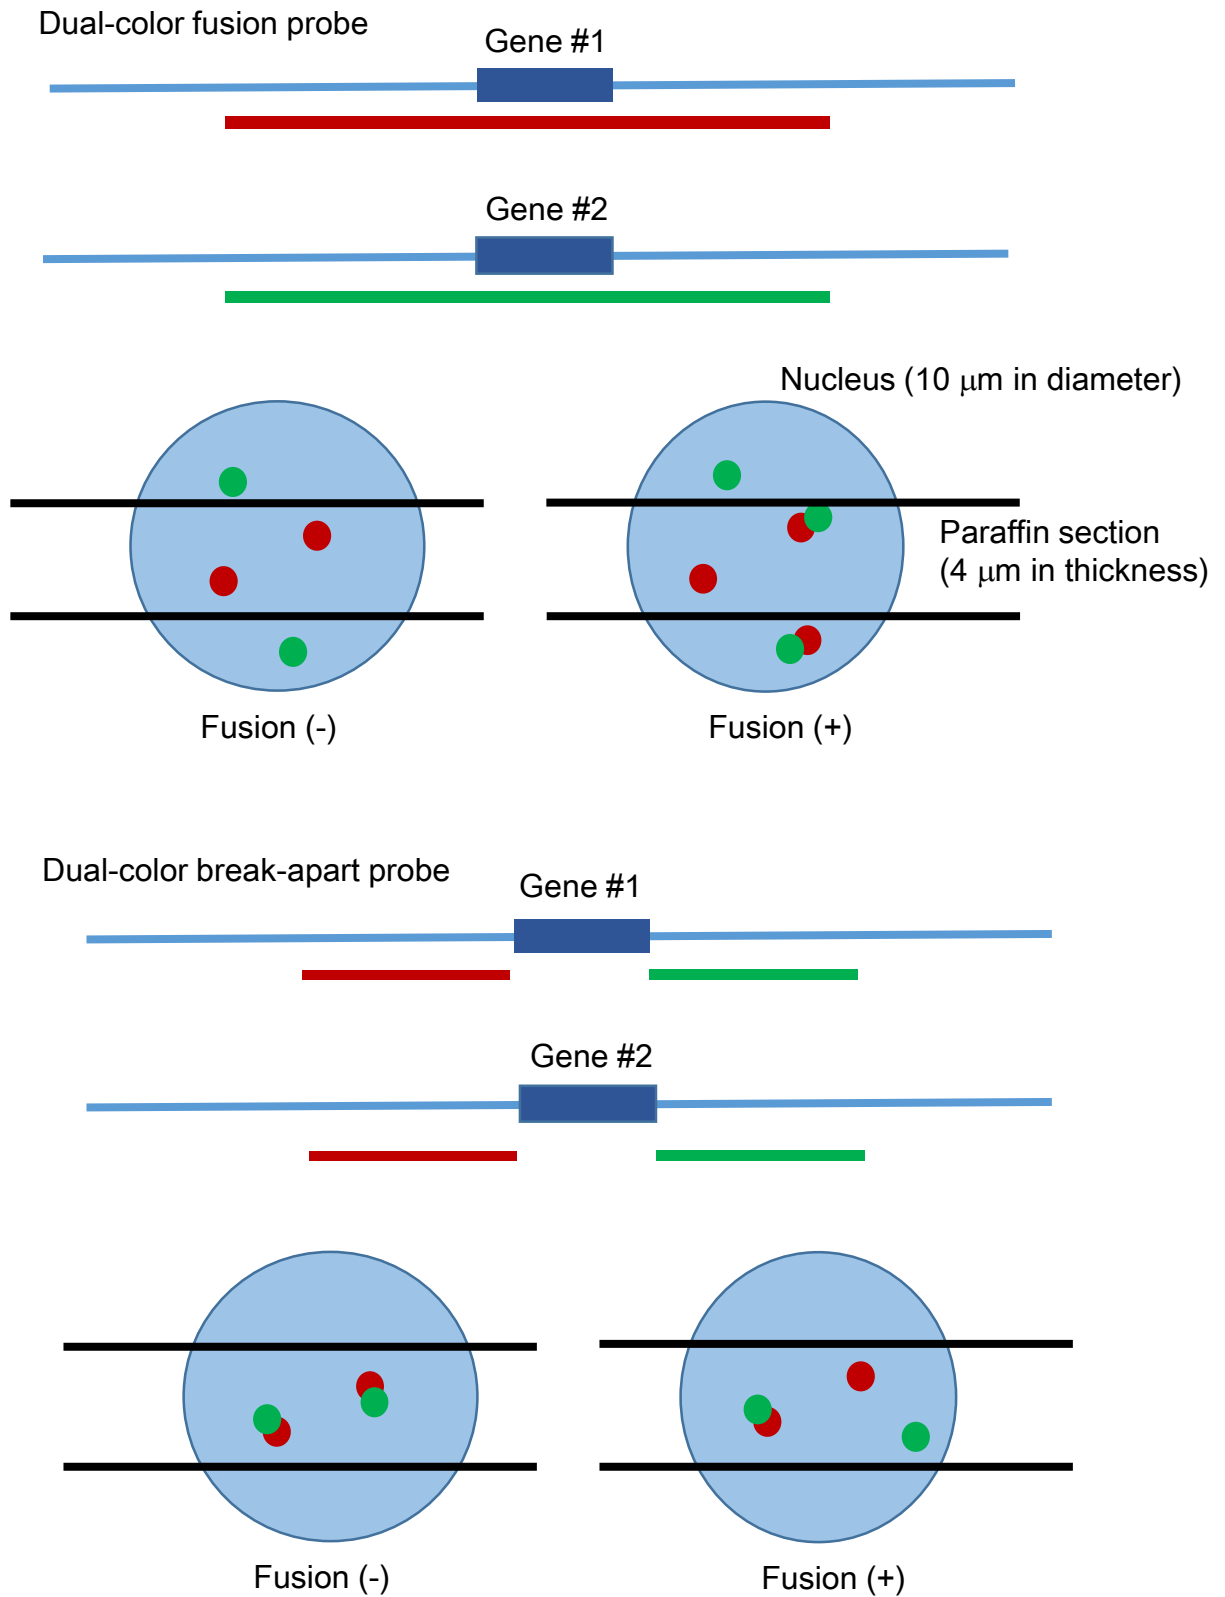

Supplement: CAS-110-2600-s001.pdf [file CAS-110-2600-s001.pdf]
